# Supplementary material
Source: HighWire-hosted journal article supplement (https://erj.ersjournals.com/highwire/filestream/113777/field_highwire_adjunct_files/0/43-1_CME.pdf)
Supplement: 43-1_CME.pdf [file 43-1_CME.pdf]

# CME Credit Application Form

## (1 CME credit)

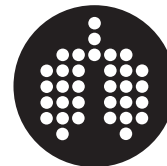

To receive CME credits, read the CME article in this issue, indicate the correct responses to the educational questions and complete the requested information. This form is also available in electronic format at [www.erj.ersjournals.com/current.dtl](http://www.erj.ersjournals.com/current.dtl). To return your application, you can either:

- ▶ use this form and return it completed to ERS Publications Office, 442 Glossop Road, Sheffield, S10 2PX, UK; fax to +44-114-2665064; or e-mail to [info@ersj.org.uk](mailto:info@ersj.org.uk)
- ▶ fill in the online form at [www.erj.ersjournals.com/current.dtl](http://www.erj.ersjournals.com/current.dtl)

Certificates will be e-mailed to the address filled in below. Please allow 4 weeks for processing.

**CME credit applications are now free of charge.**

### Applicant personal details.

ERS Membership No. (if known): ..... Date of Birth (DD/MM/YYYY): .....

Family Name: ..... First Name: .....

Mailing Address: .....

.....

Postal Code: ..... City: ..... Country: .....

Telephone: + ..... E-mail: .....

### Educational questions.

**“*Aspergillus fumigatus* during stable state and exacerbations of COPD “**

For some questions more than one answer could be correct.

1. Which genus of fungus is recognised to be most commonly associated with pulmonary infection?

- Penicillium.  Aspergillus.  Zygomycete.

2. Allergic bronchopulmonary aspergillosis (ABPA) can occur in which of the following respiratory conditions?

- Asthma.  Cystic fibrosis.  COPD.  All of the above.

3. What proportion of COPD patients has a filamentous fungus at stable state?

- 27%.  49%.  76%.

4. Which of the following was associated with lower lung function in COPD patients?

- Sensitisation to *A. fumigatus*.  History of atopy.  Culture of filamentous fungi.

5. In COPD patients with *A. fumigatus* compared to those without, which of the following is a risk factor (tick all that apply)?

- Smoking.  Males.  Inhaled corticosteroids.  Atopy.  All of the above.

6. On average, how much lower was lung function, as indicated by FEV1 % predicted, in COPD patients sensitised to *A. fumigatus* compared to those not sensitised?

- 11%.  20%.  39%.
